# Supplementary material
Source: Springer Nature journal article supplement (https://www.springermedizin.de/resource/supplementary/13019_2012_756_MOESM2_ESM.pdf/9639040)
Supplement: MOESM2 [file 9639040]

Peripheral small GGO lesion

(n=41)

VATS wedge resection

Pathological examination of the permanent section

Non-  
malignancy  
(n=6)

Noguchi  
type A or B  
(n=16)

Other primary lung cancer (n=19)

*Two-stage surgery*  
VATS lobectomy  
with lymphadenectomy  
(n=11)

Observation  
(n=8)

Follow-up
